# Supplementary material
Source: HighWire-hosted journal article supplement (https://svn.smart01.highwire.org/content/8/1/59)
Supplement: inline-supplementary-material-1 [file inline-supplementary-material-1.pdf]

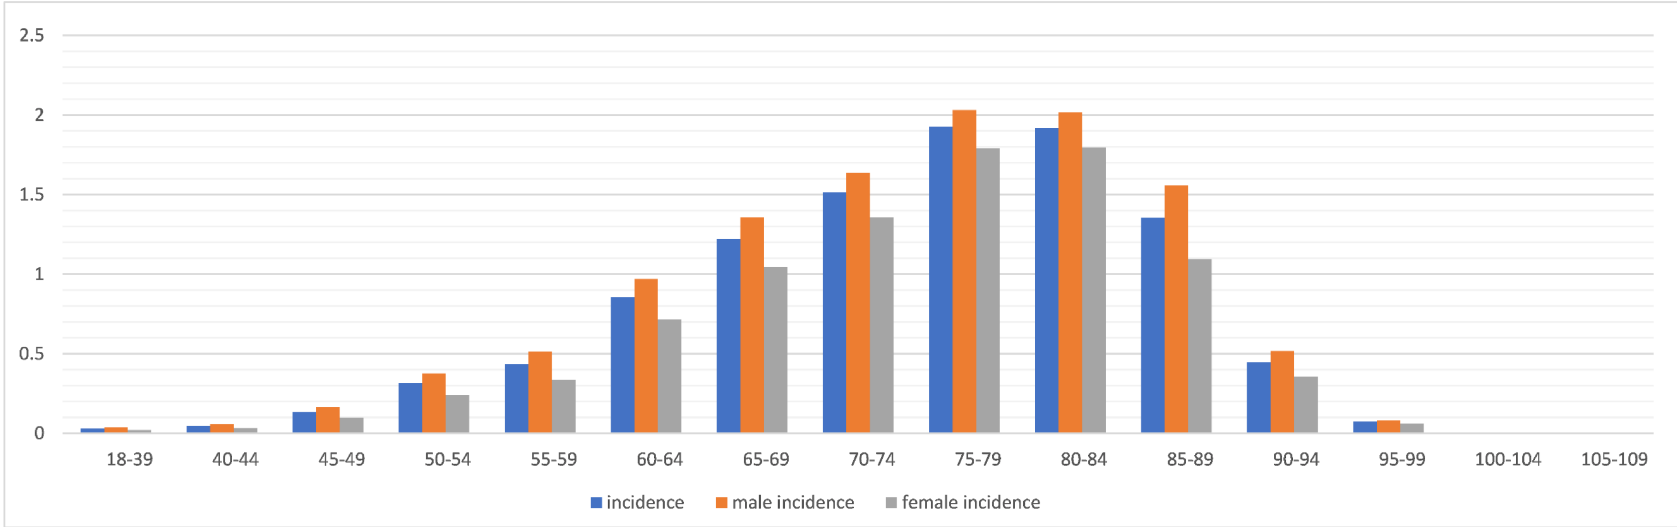

Supplementary Figure 1. The incidence of VaD grouped by age and gender  
Supplementary Figure 1 showed the distribution of VaD at different age and gender.
